# Supplementary material for: Eating disorder risks and awareness among female elite cyclists: an anonymous survey
Source: PubMed Central journal article supplement (PMC9502946; doi:10.1186/s13102-022-00563-6), 2022-09-23
Supplement: 13102_2022_563_MOESM2_ESM.pdf [file 13102_2022_563_MOESM2_ESM.pdf]

Additional file 2 regarding manuscript

Eating disorder risks and awareness among female elite cyclists: an anonymous survey

**Distribution of the four items on disordered eating behaviour**

| 1. Gone on eating  <br>binges where you<br>feel that you may<br>not be able to<br>stop?* | Freq. | Percent | Cum.   |
|------------------------------------------------------------------------------------------|-------|---------|--------|
| never                                                                                    | 39    | 32.23   | 32.23  |
| once in a month                                                                          | 45    | 37.19   | 69.42  |
| 2-3 times a month                                                                        | 21    | 17.36   | 86.78  |
| once a week                                                                              | 8     | 6.61    | 93.39  |
| 2-6 times a week                                                                         | 5     | 4.13    | 97.52  |
| once a day and more                                                                      | 3     | 2.48    | 100.00 |
| Total                                                                                    | 121   | 100.00  |        |

| 2. Ever made<br>yourself sick<br>(vomited) to<br>control your weight<br>or shape? | Freq. | Percent | Cum.   |
|-----------------------------------------------------------------------------------|-------|---------|--------|
| never                                                                             | 103   | 85.12   | 85.12  |
| once in a month                                                                   | 5     | 4.13    | 89.26  |
| 2-3 times a month                                                                 | 9     | 7.44    | 96.69  |
| once a week                                                                       | 2     | 1.65    | 98.35  |
| 2-6 times a week                                                                  | 1     | 0.83    | 99.17  |
| once a day and more                                                               | 1     | 0.83    | 100.00 |
| Total                                                                             | 121   | 100.00  |        |

| 3. Ever used<br>laxatives, diet<br>pills or diuretics<br>to control your<br>weight or shape? | Freq. | Percent | Cum.   |
|----------------------------------------------------------------------------------------------|-------|---------|--------|
| never                                                                                        | 109   | 90.08   | 90.08  |
| once in a month                                                                              | 7     | 5.79    | 95.87  |
| 2-3 times a month                                                                            | 2     | 1.65    | 97.52  |
| once a week                                                                                  | 1     | 0.83    | 98.35  |
| once a day and more                                                                          | 2     | 1.65    | 100.00 |
| Total                                                                                        | 121   | 100.00  |        |

| 4. Exercised more<br>than your coach<br>wanted to lose or<br>control your<br>weight? | Freq. | Percent | Cum.   |
|--------------------------------------------------------------------------------------|-------|---------|--------|
| never                                                                                | 58    | 47.93   | 47.93  |
| once in a month                                                                      | 22    | 18.18   | 66.12  |
| 2-3 times a month                                                                    | 22    | 18.18   | 84.30  |
| once a week                                                                          | 12    | 9.92    | 94.21  |
| 2-6 times a week                                                                     | 6     | 4.96    | 99.17  |
| once a day and more                                                                  | 1     | 0.83    | 100.00 |
| Total                                                                                | 121   | 100.00  |        |
